# Supplementary material for: Orally administered dual-targeted astaxanthin nanoparticles as novel dietary supplements for alleviating hepatocyte oxidative stress
Source: Royal Society of Chemistry journal article supplement (doi:10.1039/d3fo05319a), 2024-01-01
Supplement: d3fo05319a1.pdf [file d3fo05319a1.pdf]

**Orally dual-targeted astaxanthin nanoparticles as the novel dietary supplement  
for alleviating hepatocyte oxidative stress**

Xiumin Zhang<sup>acd</sup>, Mahwish Shaukat<sup>b</sup>, Ronggang Liu<sup>acd</sup>, Liyang Peng<sup>acd</sup>, Yuxiao Wang<sup>acd</sup>, Wentao Su<sup>acd</sup>, Yukun Song<sup>acd\*</sup>, Mingqian Tan<sup>acd</sup>

*<sup>a</sup>Academy of Food Interdisciplinary Science, School of Food Science and Technology, Dalian Polytechnic University, Qinggongyuan1, Ganjingzi District, Dalian 116034, Liaoning, China*

*<sup>b</sup>Department of Food Sciences, Cholistan University of Veterinary & Animal Sciences, Bahawalpur 63100, Pakistan*

*<sup>c</sup>State Key Laboratory of Marine Food Processing and Safety Control, Dalian Polytechnic University, Dalian 116034, Liaoning, China*

*<sup>d</sup>National Engineering Research Center of Seafood, Dalian Polytechnic University, Dalian 116034, Liaoning, China*

\* To the correspondence

Name: Yukun Song

E-mail: songyukun@dlpu.edu.cn

Correspondence address: Academy of Food Interdisciplinary Science, School of Food Science and Technology, Dalian Polytechnic University, Qinggongyuan1, Ganjingzi District, Dalian 116034, Liaoning, China

Tel & Fax: +86-0411-86318657

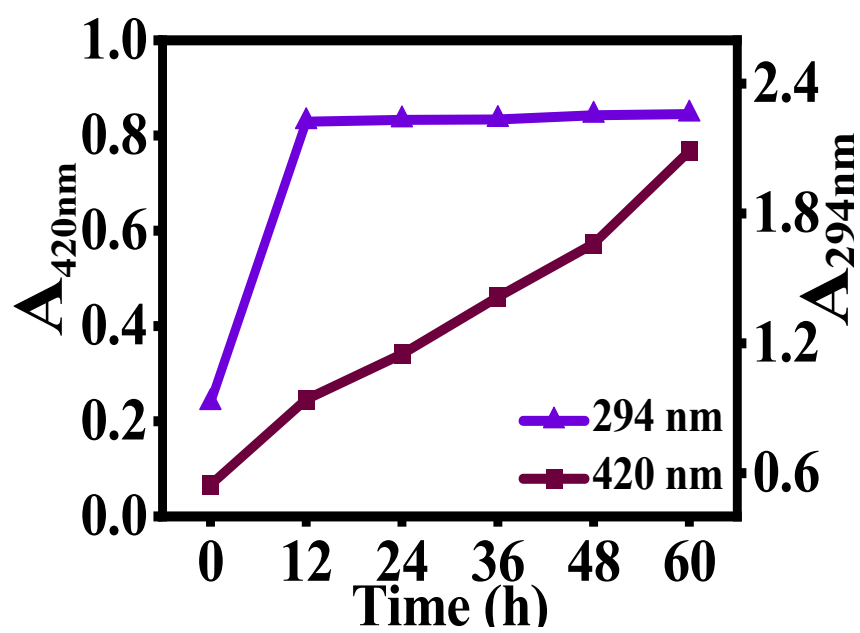

Figure S1. Browning index of WPI-GOS at wavelength 420 nm and absorbance of intermediates at 294 nm.

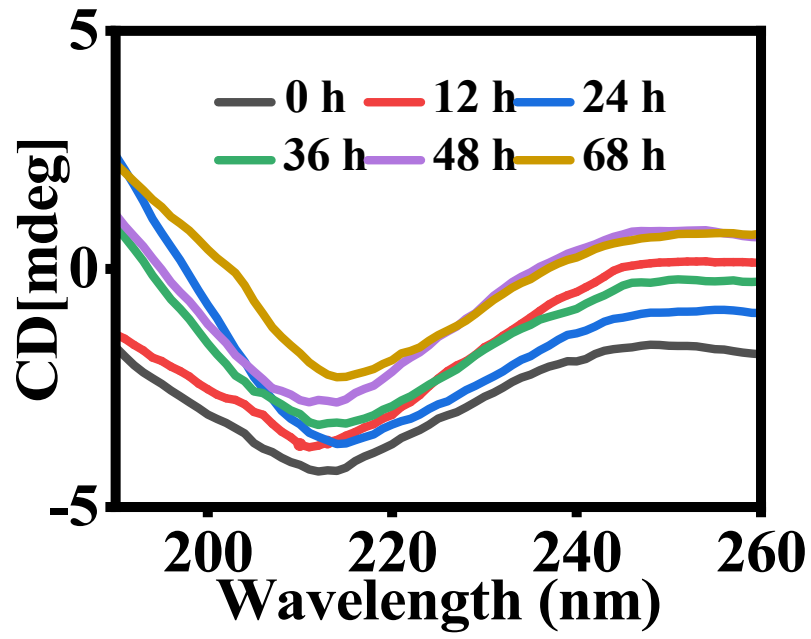

Figure S2 Circular dichroism spectra of WPI-GOS at different time.

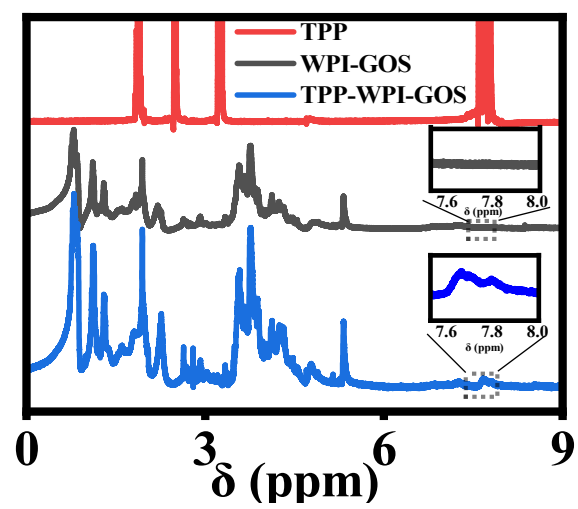

Figure S3 <sup>1</sup>H NMR spectra of TPP, WPI-GOS and TPP-WPI-GOS

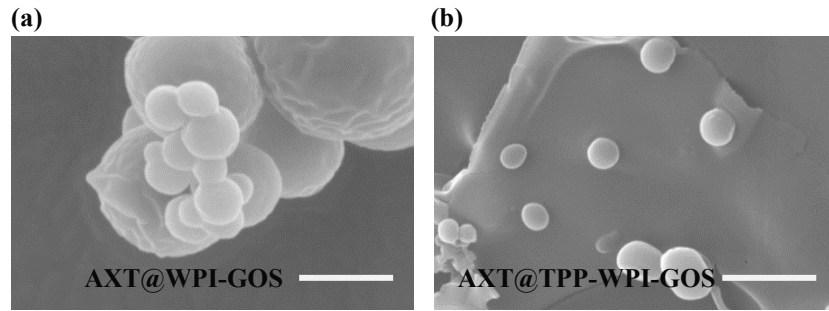

Fig. S4 SEM images of AXT@WPI-GOS and AXT@TPP-WPI-GOS nanoparticles.

Scale bars were 500 nm.
